# Supplementary material for: Exploring the poststroke experiences and unmet needs of South Asian communities in high-income countries: a scoping review protocol
Source: HighWire-hosted journal article supplement (doi:10.1136/bmjopen-2021-059017), 2022-04-01
Supplement: bmjopen-2021-059017supp002_data_supplement.pdf [file bmjopen-2021-059017supp002_data_supplement.pdf]

Supplementary material 2: Database(s): **Ovid MEDLINE: Epub Ahead of Print, In-Process & Other Non-Indexed Citations, Ovid MEDLINE® Daily and Ovid MEDLINE® 1946-Present**  
Search Strategy:

| #  | Searches                                                                                                                                                                                                                                                                                                                                                                                                                                                                                                                       | Results |
|----|--------------------------------------------------------------------------------------------------------------------------------------------------------------------------------------------------------------------------------------------------------------------------------------------------------------------------------------------------------------------------------------------------------------------------------------------------------------------------------------------------------------------------------|---------|
| 1  | exp Asian Continental Ancestry Group/                                                                                                                                                                                                                                                                                                                                                                                                                                                                                          | 77992   |
| 2  | Ethnic Groups/                                                                                                                                                                                                                                                                                                                                                                                                                                                                                                                 | 66081   |
| 3  | Minority Groups/                                                                                                                                                                                                                                                                                                                                                                                                                                                                                                               | 15460   |
| 4  | Minority Health/                                                                                                                                                                                                                                                                                                                                                                                                                                                                                                               | 850     |
| 5  | (asian* or south* asian* or asiatic* or indoasia* or indo asia*).tw,kf.                                                                                                                                                                                                                                                                                                                                                                                                                                                        | 101987  |
| 6  | (sri lanka* or lanka* or ceylon* or india* or bangladesh* or pakistan* or nepal* or bhutan* or maldiv* or afghan* or hindu* or hindi or tamil* or gujarat* or punjab* or bengali* or urdu*).tw,kf.                                                                                                                                                                                                                                                                                                                             | 245496  |
| 7  | ((ethnic* or racial* or race) adj3 (group* or minorit* or health*)) or (minorit* adj3 (group* or health* or racial* or race)).tw,kf.                                                                                                                                                                                                                                                                                                                                                                                           | 73085   |
| 8  | 1 or 2 or 3 or 4 or 5 or 6 or 7                                                                                                                                                                                                                                                                                                                                                                                                                                                                                                | 496999  |
| 9  | "intracranial embolism and thrombosis"/ or intracranial embolism/ or exp intracranial thrombosis/ or exp intracranial hemorrhages/ or stroke/ or brain infarction/ or brain stem infarctions/ or lateral medullary syndrome/ or cerebral infarction/ or cadasil/ or dementia, multi-infarct/ or infarction, anterior cerebral artery/ or infarction, middle cerebral artery/ or infarction, posterior cerebral artery/ or hemorrhagic stroke/ or ischemic stroke/ or embolic stroke/ or thrombotic stroke/ or stroke, lacunar/ | 228009  |
| 10 | cerebrovascular disorders/ or hypoxia-ischemia, brain/                                                                                                                                                                                                                                                                                                                                                                                                                                                                         | 53395   |
| 11 | Stroke Rehabilitation/                                                                                                                                                                                                                                                                                                                                                                                                                                                                                                         | 15084   |
| 12 | (stroke* or poststroke*).tw,kf.                                                                                                                                                                                                                                                                                                                                                                                                                                                                                                | 280051  |
| 13 | ((cerebrovasc* or cerebr* vasc*) adj3 (accident* or disorder* or disease* or event* or incident* or infract*).tw,kf.                                                                                                                                                                                                                                                                                                                                                                                                           | 45751   |
| 14 | ((cerebral or brain* or intracerebral or subarachnoid or "sub arachnoid" or intracranial or intra cranial or subdural or "sub dural") adj3 (infarct* or haemorrhag* or hemorrhag* or ischemia* or ischaemia* or bleed* or thrombos* or thrombus* or embolism*).tw,kf.                                                                                                                                                                                                                                                          | 136176  |
| 15 | 9 or 10 or 11 or 12 or 13 or 14                                                                                                                                                                                                                                                                                                                                                                                                                                                                                                | 485609  |
| 16 | 8 and 15                                                                                                                                                                                                                                                                                                                                                                                                                                                                                                                       | 8574    |
